# Supplementary material for: Anaphylatoxin Complement 5a in Pfizer BNT162b2-Induced Immediate-Type Vaccine Hypersensitivity Reactions
Source: MDPI journal article supplement (doi:10.3390/vaccines11061020), 2023-05-23
Supplement: s1 [file s1]

## Supplementary appendix

**Table S1. Laboratory findings of 10 patients with anaphylaxis to Pfizer BNT162b2 vaccine**

| S/N | Time of blood collection after the onset of anaphylaxis | Tryptase Ng/ml | C5a Ng/ml | ICAM-1 Ng/ml | Anti-BNT162b2 IgG ng/ml | Anti-BNT162b2 IgM (AU/ml) | Anti-BNT162b2 IgE (ng/ml) | WBC 10 <sup>9</sup> /L | Lymphocytes 10 <sup>9</sup> /L | Hb g/dL | Plt 10 <sup>9</sup> /L |
|-----|---------------------------------------------------------|----------------|-----------|--------------|-------------------------|---------------------------|---------------------------|------------------------|--------------------------------|---------|------------------------|
| 1   | 3 hours                                                 | 3.2            | 448.6     | 138.0        | 83.0                    | 34.4                      | N.D.                      | 10.6                   | 0.93                           | 15.9    | 414                    |
| 2   | 6 hours                                                 | 2.2            | 571.6     | 56.5         | 290.8                   | 59.1                      | N.D.                      | 10.5                   | 3.89                           | 13.9    | 380                    |
| 3   | 6 hours                                                 | 2.3            | 696.8     | 164.0        | 2348.0                  | 182.5                     | N.D.                      | 8.2                    | 3.08                           | 14.0    | 413                    |
| 4   | 5 hours                                                 | 5.1            | 625.1     | 126.0        | 1436.0                  | 25.2                      | N.D.                      | 3.9                    | 0.91                           | 11.8    | 221                    |
| 5   | 48 hours                                                | 1.8            | 40.8      | 80.3         | 1144.0                  | 21.7                      | N.D.                      | 7.5                    | 2.35                           | 13.4    | 315                    |
| 6   | 5 hours                                                 | 3.4            | 49.1      | 86.3         | 322.0                   | 29.0                      | N.D.                      | 13.9                   | 5.04                           | 13.0    | 517                    |
| 7   | 72 hours                                                | 4.4            | 49.1      | 69.4         | 316.2                   | 63.4                      | N.D.                      | N.A.                   | N.A.                           | N.A.    | N.A.                   |
| 8   | 5 hours                                                 | 6.3            | 572.5     | 97.2         | 372.6                   | 53.4                      | N.D.                      | 8.4                    | 3.42                           | 13.1    | 243                    |
| 9   | 42 hours                                                | 3.9            | 21.0      | 98.0         | 288.8                   | 50.0                      | N.D.                      | 6.8                    | 0.91                           | 13.6    | 282                    |
| 10  | 70 hours                                                | 2.9            | 50.0      | 106.7        | 251.6                   | 29.9                      | N.D.                      | N.A.                   | N.A.                           | N.A.    | N.A.                   |

Baseline tryptase was followed up subsequently and the acute tryptase samples did not show significant rise ( $> 1.2 \times$  baseline tryptase + 2 ng/L)

Abbreviations: N.A., Not Available; N.D., Not Detectable; WBC, White Blood Cell; Hb, Haemoglobin; Plt, Platelets
